# Supplementary material for: Macrocyclic aromatic tetrasulfonamides with a stable cone conformation
Source: Royal Society of Chemistry journal article supplement (doi:10.1039/b503921e), 2005-01-01
Supplement: b503921e.pdf [file b503921e.pdf]

Supplementary Information for *Chem. Commun.*

**Macrocyclic aromatic tetrasulfonamides with a stable  
cone conformation**

Lan He,<sup>\*a</sup> Yu An,<sup>a</sup> Lihua Yuan,<sup>b</sup> Kazuhiro Yamato,<sup>b</sup> Wen Feng,<sup>b</sup> Oksana Gerlitz,<sup>b</sup> Chong Zheng<sup>c</sup> and Bing Gong<sup>\*b</sup>

<sup>a</sup> *Department of Chemistry, Beijing Normal University, Beijing 100875, China. Tel: (+86) 10 5880 2076; E-mail: helan1961@hotmail.com*

<sup>b</sup> *Department of Chemistry, University at Buffalo, The State University of New York, Buffalo, New York 14260, USA. Fax: (+1) 716 645 6963; Tel: (+1) 716 645 6800; E-mail: bgong@buffalo.edu*

<sup>c</sup> *Department of Chemistry, Northern Illinois University DeKalb, Illinois 60115, USA.*

## Experimental procedures

NMR analyses were carried out on Varian INOVA 500 spectrometer (500 MHz). Tetramethylsilane (TMS) or deuterated N, N-dimethyl formamide (DMF-d<sub>7</sub>) was used as the internal standard for <sup>1</sup>H NMR and the deuterated solvent (CDCl<sub>3</sub>) as standard for <sup>13</sup>C NMR. Chemical shifts are reported in <sup>τ</sup> ppm values downfield from tetramethylsilane and *J* values are reported in Hz.

**General procedure for preparing macrocycles 4.** 1,3-Diamino-4,6-dimethoxybenzene (2.19mmol) was dissolved in CH<sub>2</sub>Cl<sub>2</sub> (15mL) to give solution A. 4, 6-Dialkoxybenzene-1, 3-disulphonyl chloride was dissolved in CH<sub>2</sub>Cl<sub>2</sub> (15mL) to give solution B. Solution A, solution B and triethylamine (4.38 mmol) were added at the same time to a flask at around -12 °C. The reaction mixture was stirred until it gradually warmed up to room temperature (4-6 hrs), and was then heated and refluxed for 12-24 hrs. The reaction was quenched by addition of acetyl chloride followed by methanol. After evaporating the solvent, the crude product was washed with methanol, acetone, THF, and was then recrystallized with DMF to give the pure products as white solids.

### I. NMR spectra of 4a-4d

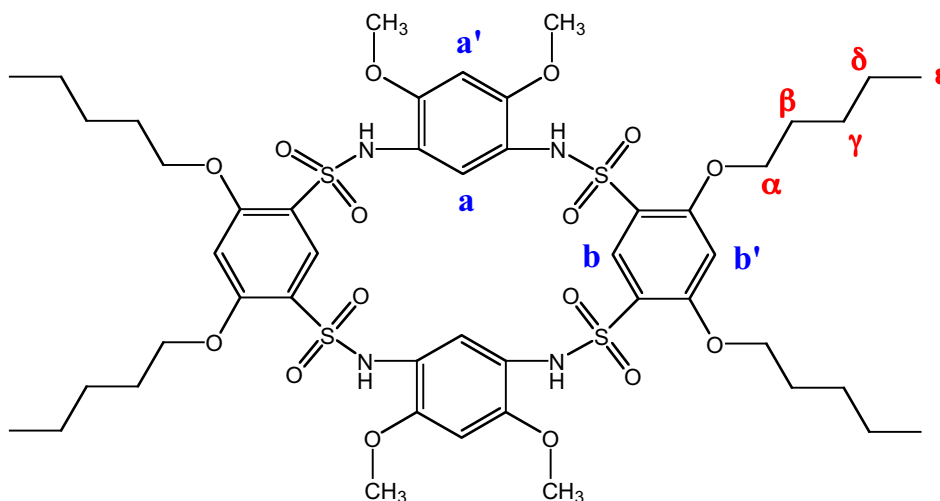

Compound 4b

**Table 1** Chemical shift of compound **4b** in DMF-d<sub>6</sub>

| Temp               | Ar    |       |       |       | Alkyl |       |       |       |         |         |       |
|--------------------|-------|-------|-------|-------|-------|-------|-------|-------|---------|---------|-------|
|                    | b     | a     | b'    | a'    | OMe   | α     | β     | γ     | δ       | ε       | NH    |
| 60 <sup>0</sup> C  | 7.799 | 7.464 | 7.130 | 6.435 | 3.544 | 4.458 | 1.997 | 1.564 | 1.432   | 0.930   | 7.647 |
| 50 <sup>0</sup> C  | 7.801 | 7.460 | 7.139 | 6.438 | 3.546 | 4.462 | 2.001 | 1.562 | 1.430   | 0.930   | 7.693 |
| 30 <sup>0</sup> C  | 7.803 | 7.453 | 7.156 | 6.443 | 3.548 | 4.466 | 2.008 | 1.556 | 1.434   | 0.929   | 7.793 |
| 20 <sup>0</sup> C  | 7.806 | 7.449 | 7.164 | 6.445 | 3.550 | 4.469 | 2.013 | 1.553 | 1.431   | 0.929   | 7.857 |
| 0 <sup>0</sup> C   | 7.812 | 7.440 | 7.179 | 6.448 | 3.553 | 4.472 | 2.021 | 1.544 | 1.416   | 0.927   | 8.005 |
| -10 <sup>0</sup> C | 7.815 | 7.436 | 7.186 | 6.449 | 3.555 | 4.474 | 2.028 | 1.538 | 1.421   | 0.927   | 8.089 |
| -20 <sup>0</sup> C | 7.819 | 7.431 | 7.192 | 6.448 | 3.555 | 4.475 | 2.032 | 1.575 | 1.417   | 0.925   | 8.181 |
| Δδ*                | 0.02  | 0.033 | 0.062 | 0.013 | 0.011 | 0.017 | 0.035 | 0.011 | -0.0015 | -0.0005 | 0.534 |

\* Δδ= δ(-20<sup>0</sup>C) - δ(60<sup>0</sup>C)

lan3\_50%DMF\_50%CD2Cl4

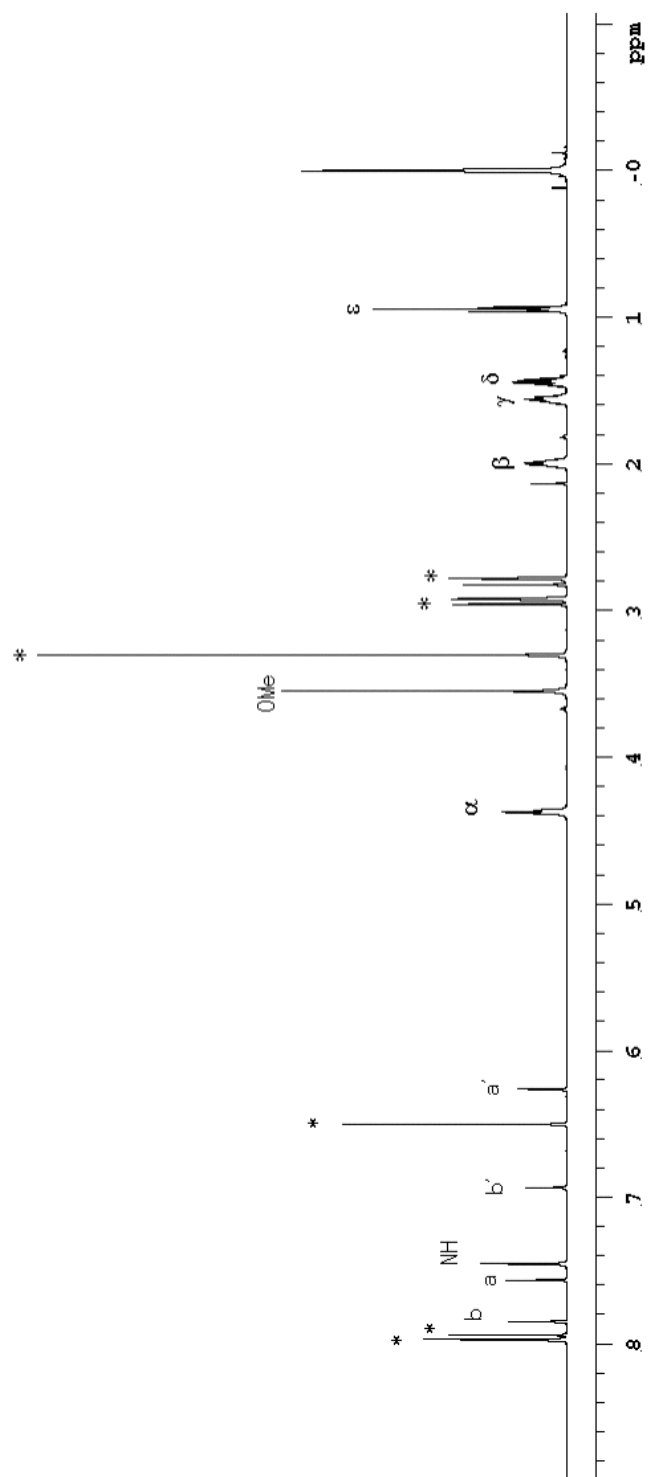

**Fig.1**  $^1\text{H}$  NMR spectrum of compound **4b** (R=-n-C<sub>5</sub>H<sub>11</sub>) in 50%DMF-d<sub>7</sub> at 294 K (\* from solvents).

**4b** (R=-n-C<sub>5</sub>H<sub>11</sub>) in 50%DMF-d<sub>7</sub> 7-

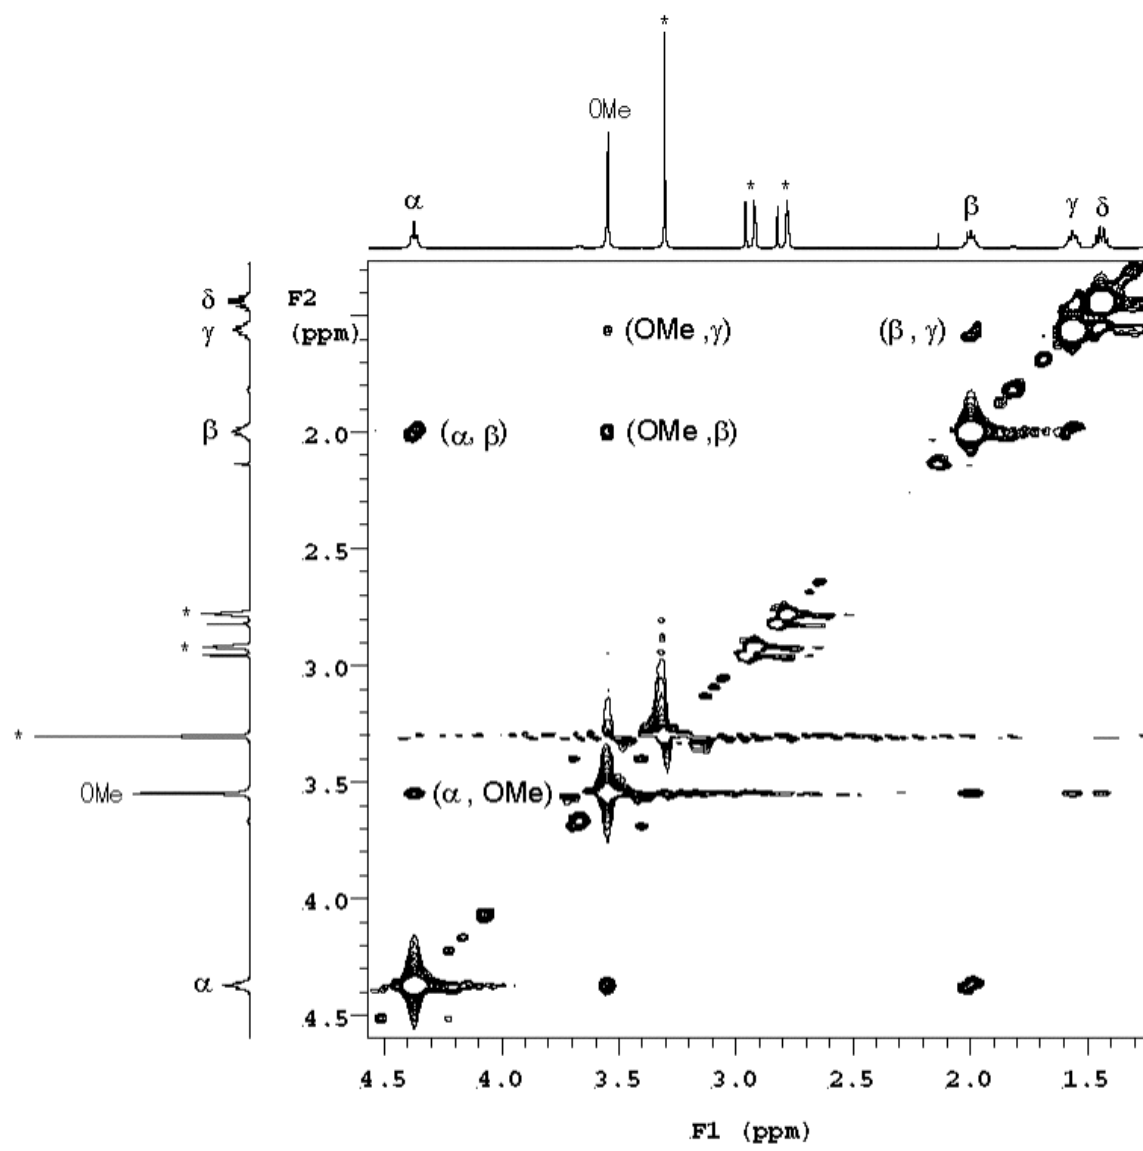

**Fig.2** Partial 2D NOE spectrum of compound **4b** (R=-n-C<sub>5</sub>H<sub>11</sub>) in 50%DMF-d<sub>7</sub>-50%CDCl<sub>2</sub>CDCl<sub>2</sub> at 294 K (\* from solvents).

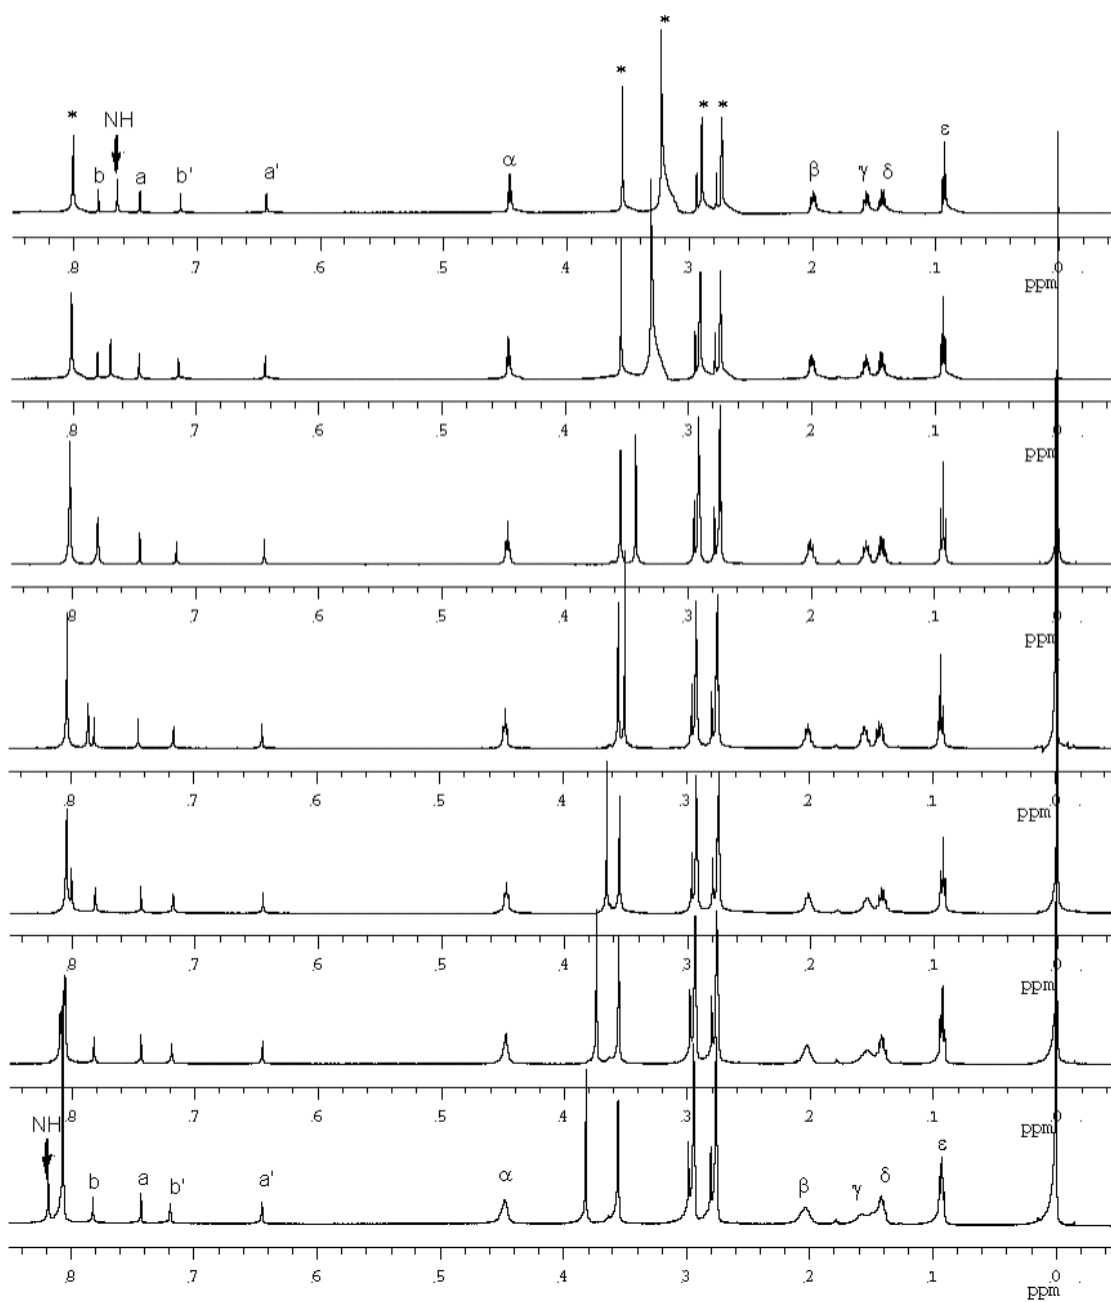

**Fig.3** Variable temperature 1D NMR spectra of compound **4b** (R= -n-C<sub>5</sub>H<sub>11</sub>) in DMF-d<sub>7</sub> at 294 K (\* from solvents).

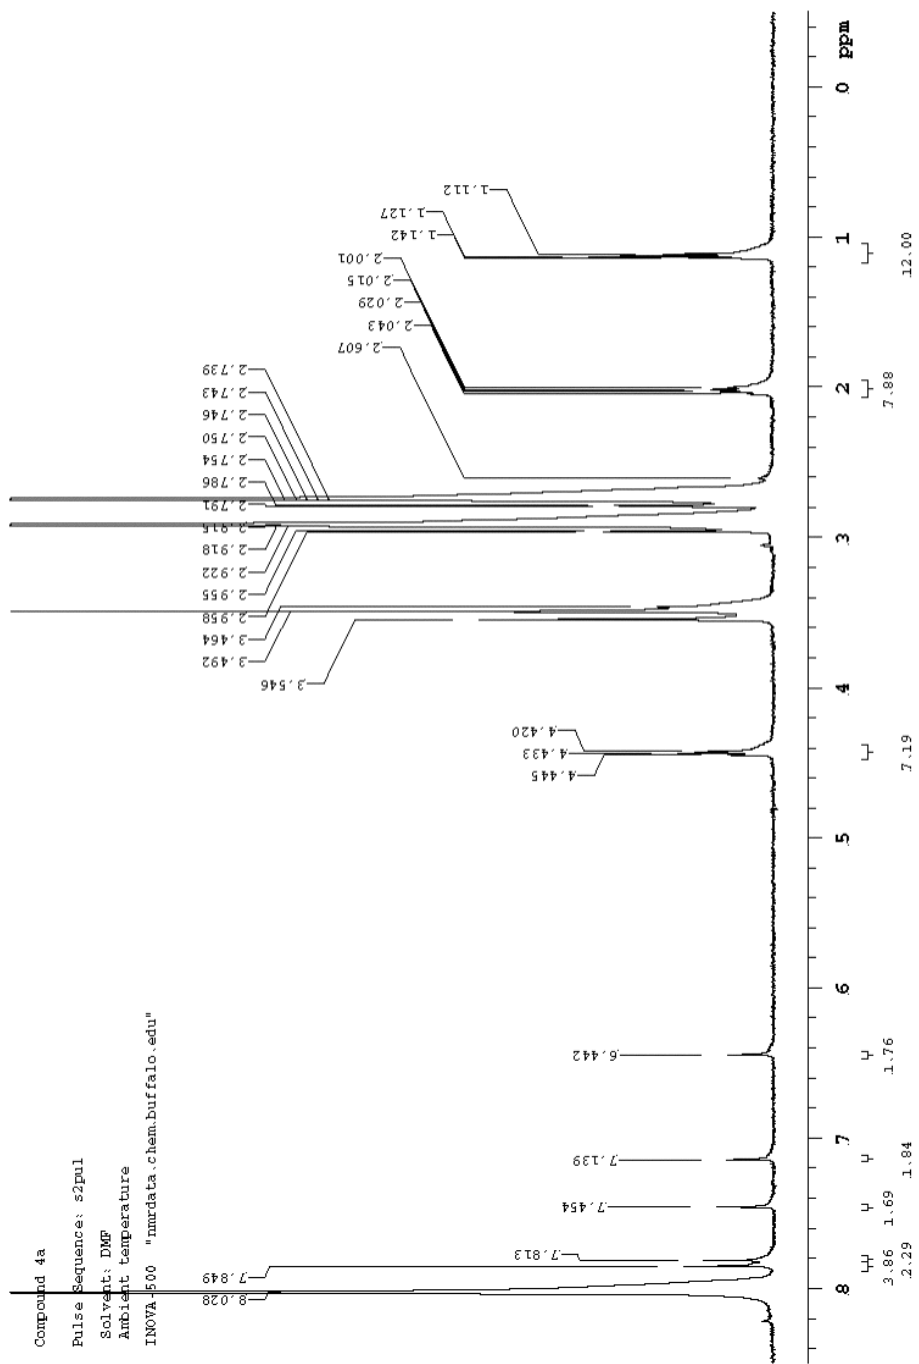

**Fig.4**  $^1\text{H}$  NMR spectrum of compound **4a** ( $\text{R} = \text{-n-C}_3\text{H}_7$ ) in  $\text{DMF-d}_7$  at 294 K.

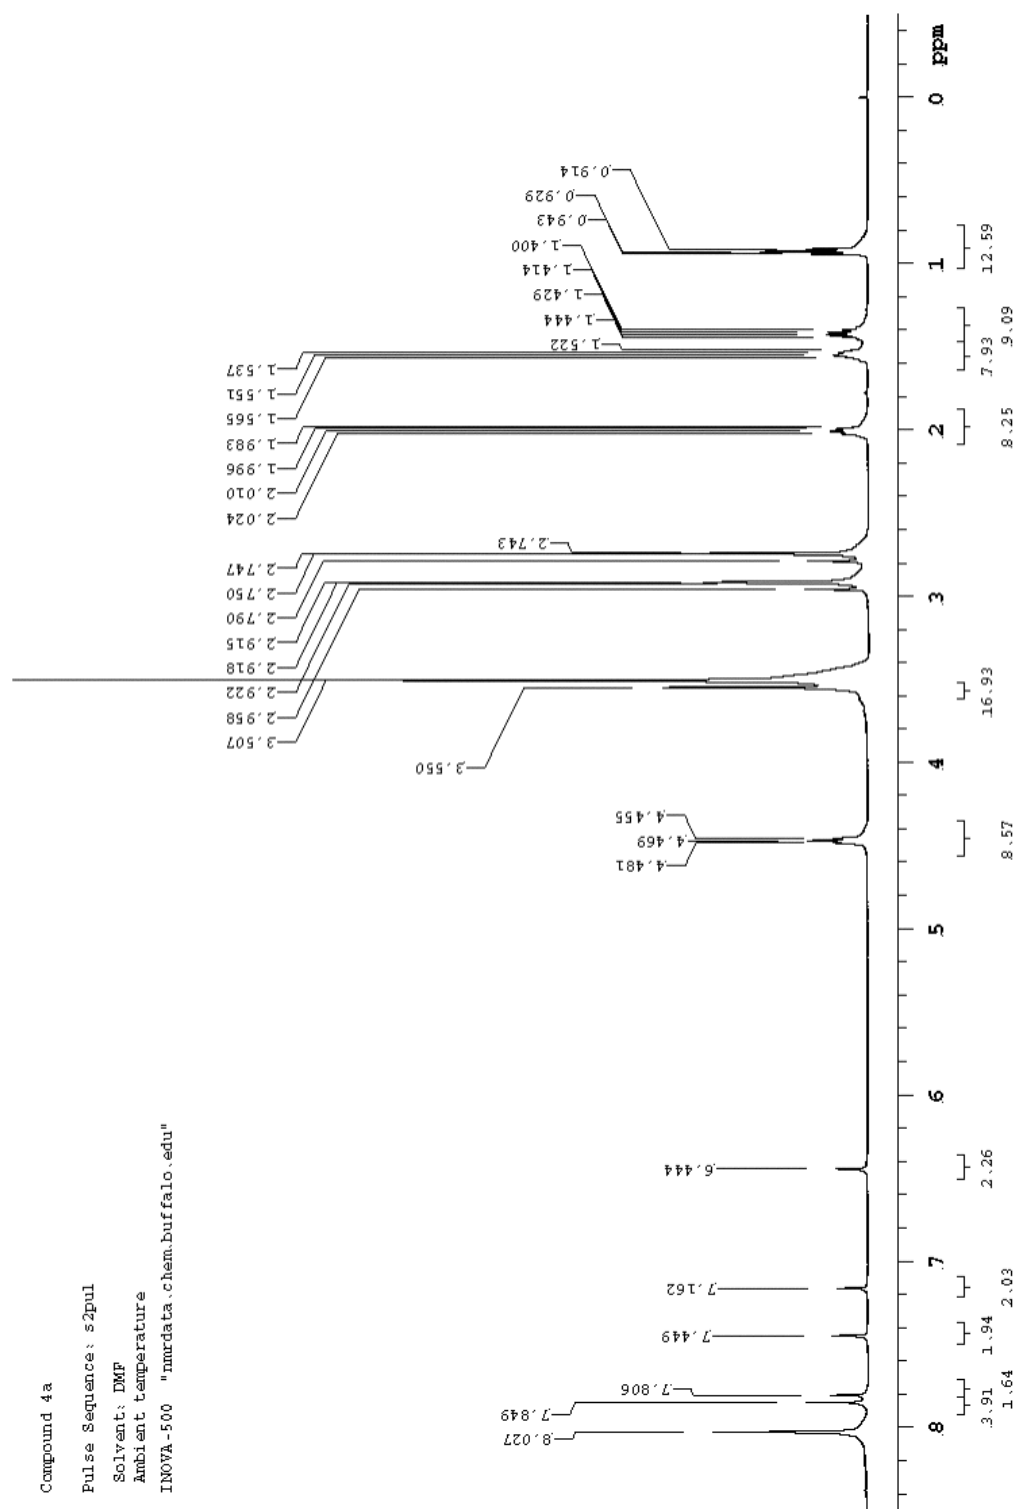

**Fig.5**  $^1\text{H}$  NMR spectrum of compound **4b** ( $\text{R} = -n\text{-C}_5\text{H}_{11}$ ) in  $\text{DMF-d}_7$  at 294 K.



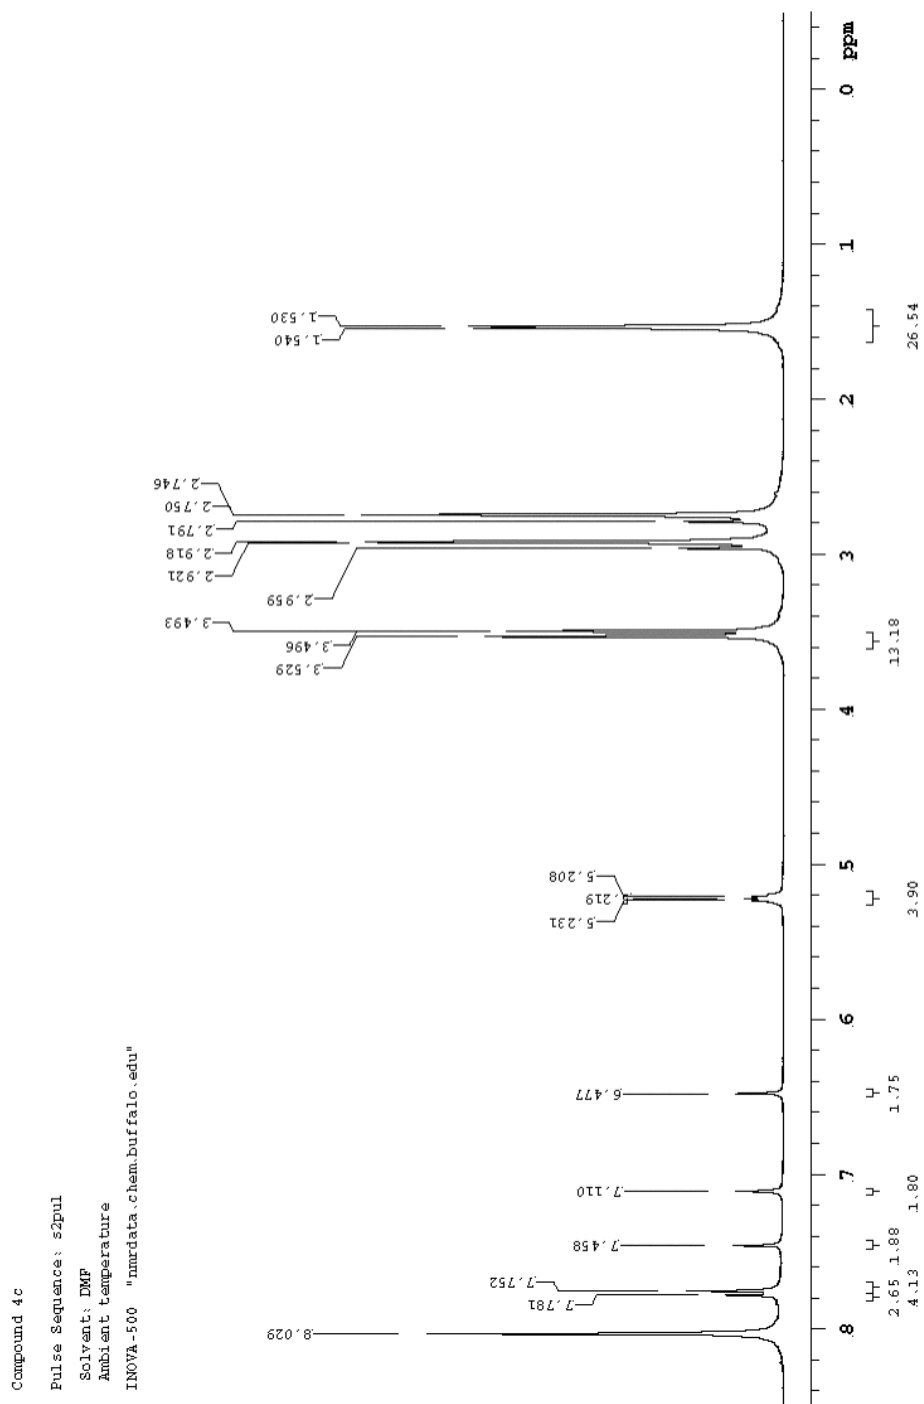

**Fig.6**  $^1\text{H}$  NMR spectrum of compound **4c** ( $\text{R} = -i\text{-C}_3\text{H}_7$ ) in  $\text{DMF-d}_7$  at 294 K.

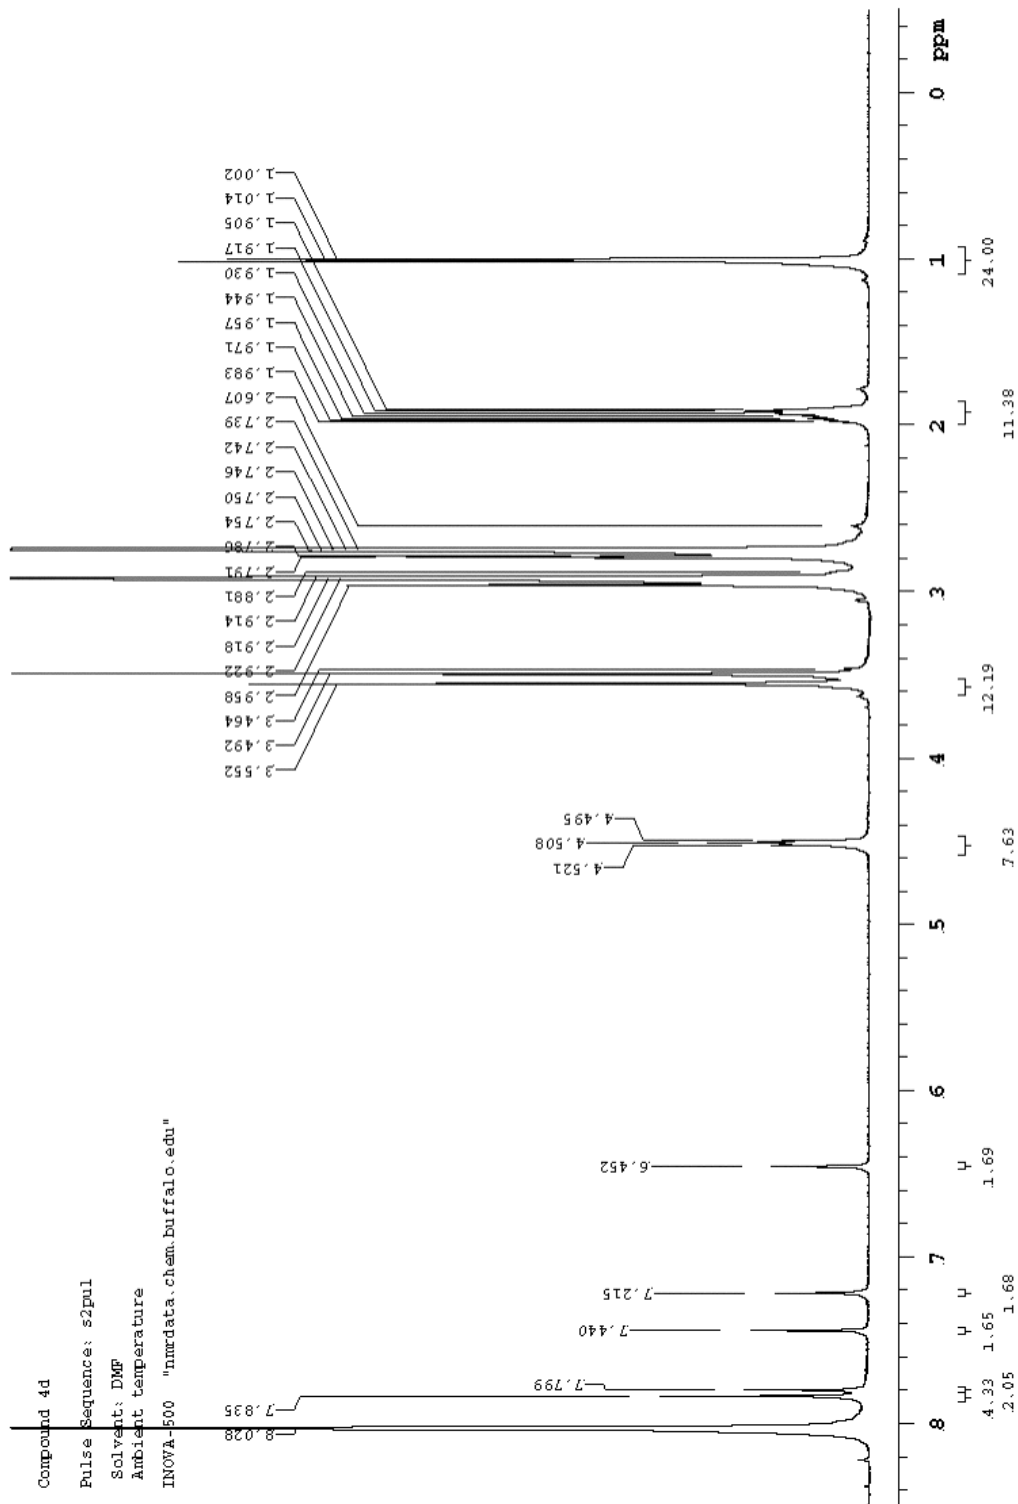

Fig.7  $^1\text{H}$  NMR spectrum of compound **4b** ( $\text{R}=\text{n-C}_5\text{H}_{11}$ ) in  $\text{DMF-d}_7$  at 294 K.

## II. MALDI-TOF spectra of 4a-4d

Sample was prepared by post-mix method. Dithranol (2  $\mu$ l) dissolved in  $\text{CH}_2\text{Cl}_2$  (20 g/L) was spotted on the target and air dried, then analyte solution in DMF was spotted on the thin layer of matrix. MALDI TOF MS spectra were recorded on a Bruker Biflex IV MS spectrometer with reflector mode.

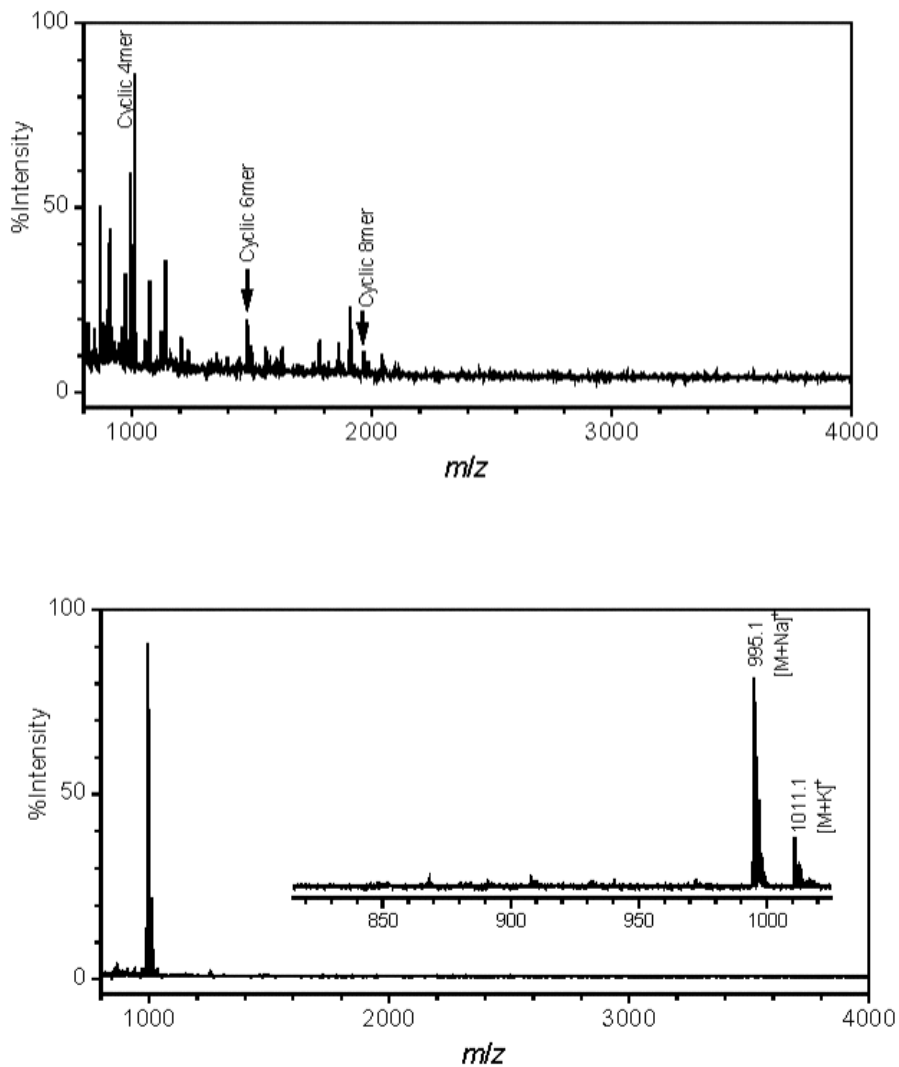

**Fig.8** MALDI TOF MS Spectra of **4a** (R=  $-n\text{-C}_3\text{H}_7$ ). (Upper: crude, Lower: Purified).

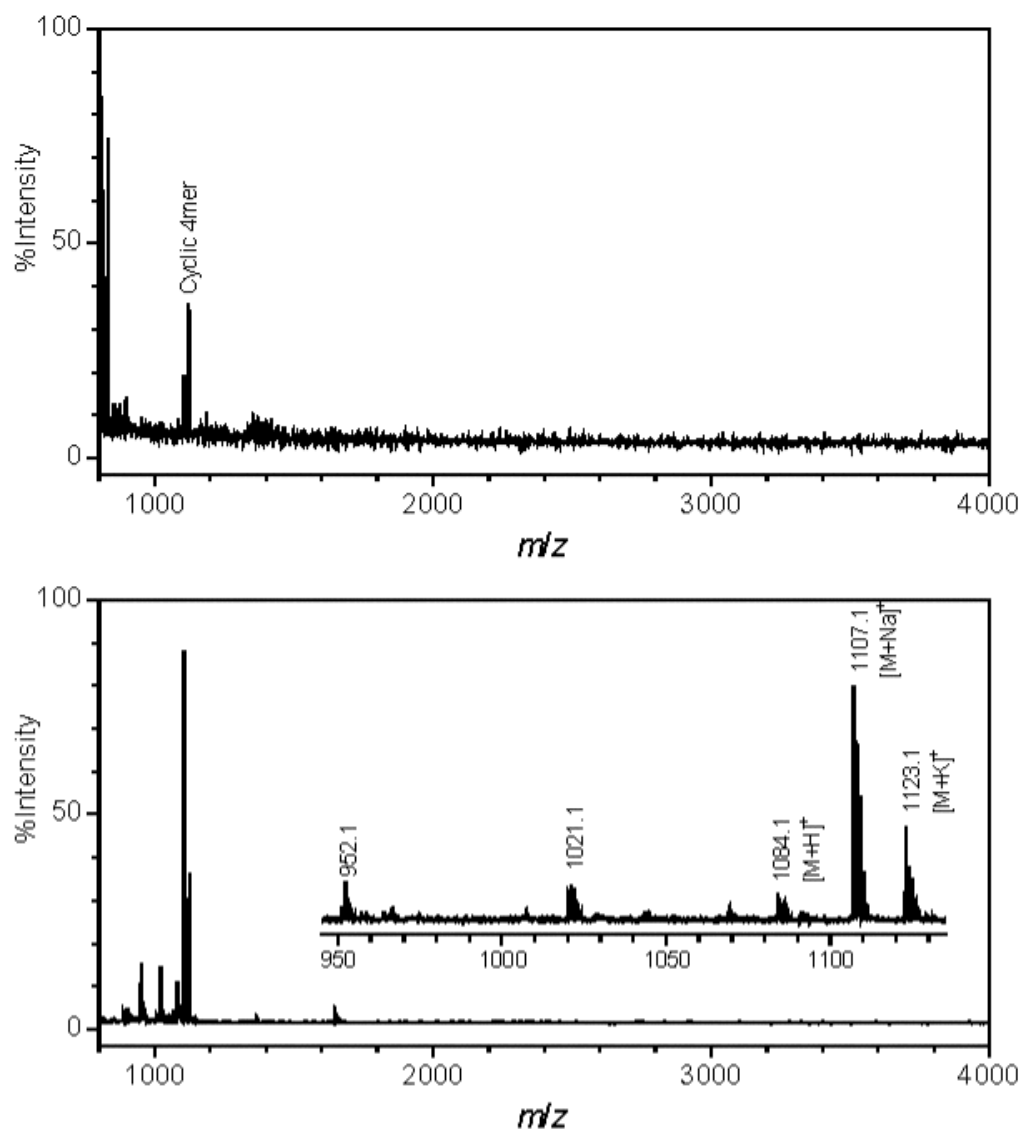

**Fig.9** MALDI TOF MS Spectra of **4b** (R= -n-C<sub>5</sub>H<sub>11</sub>). (Upper: crude, Lower: Purified).

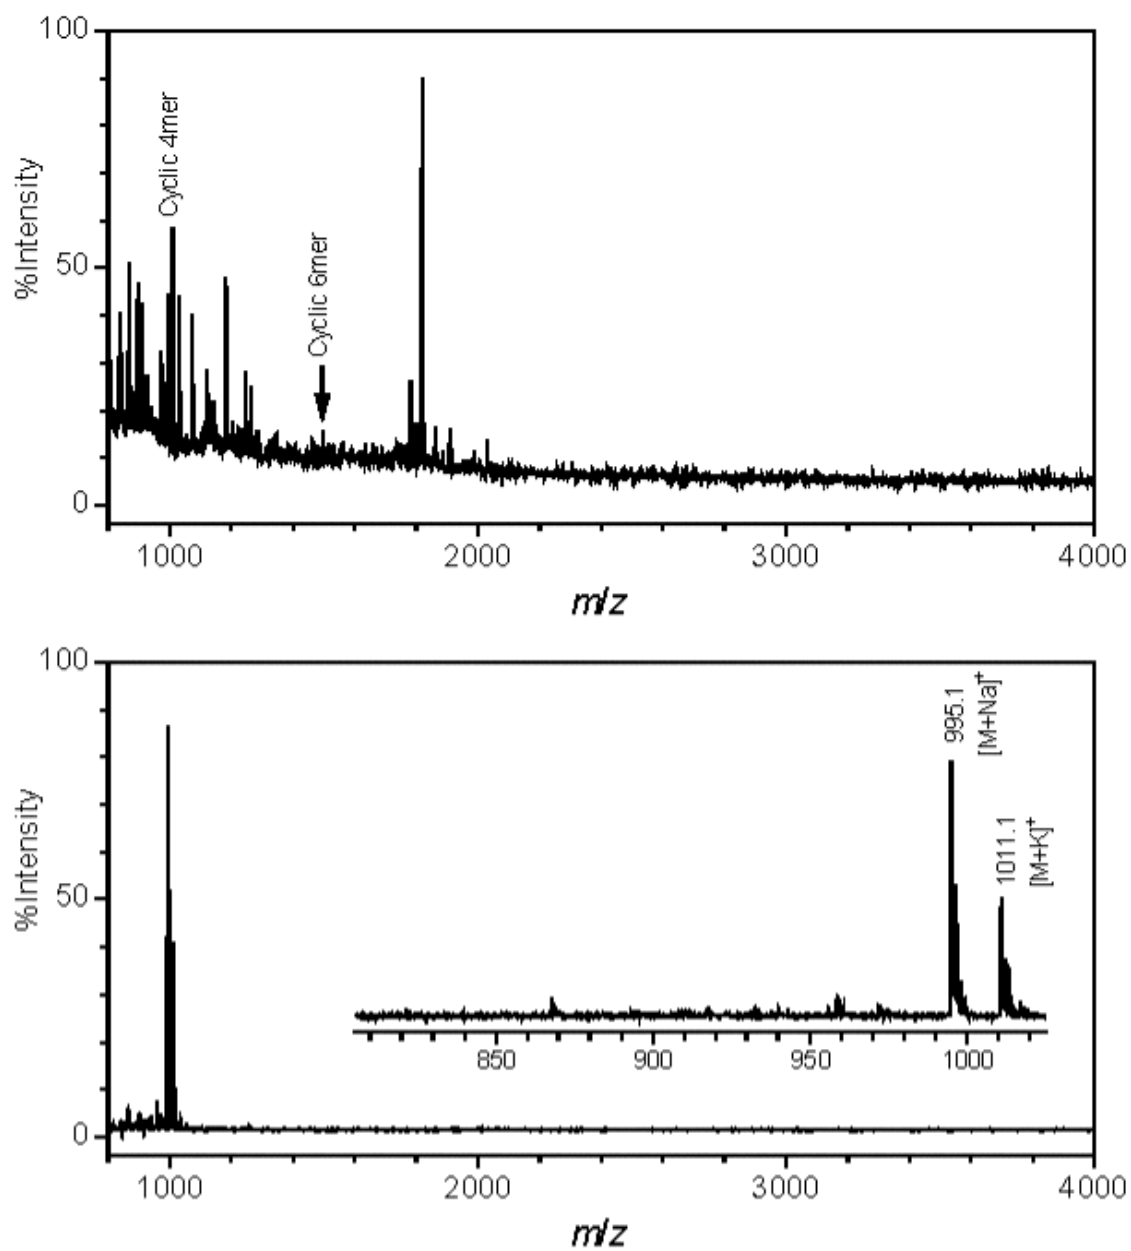

**Fig.10** MALDI TOF MS Spectra of **4c** (R= *i*-C<sub>3</sub>H<sub>7</sub>). (Upper: crude, Lower: Purified).

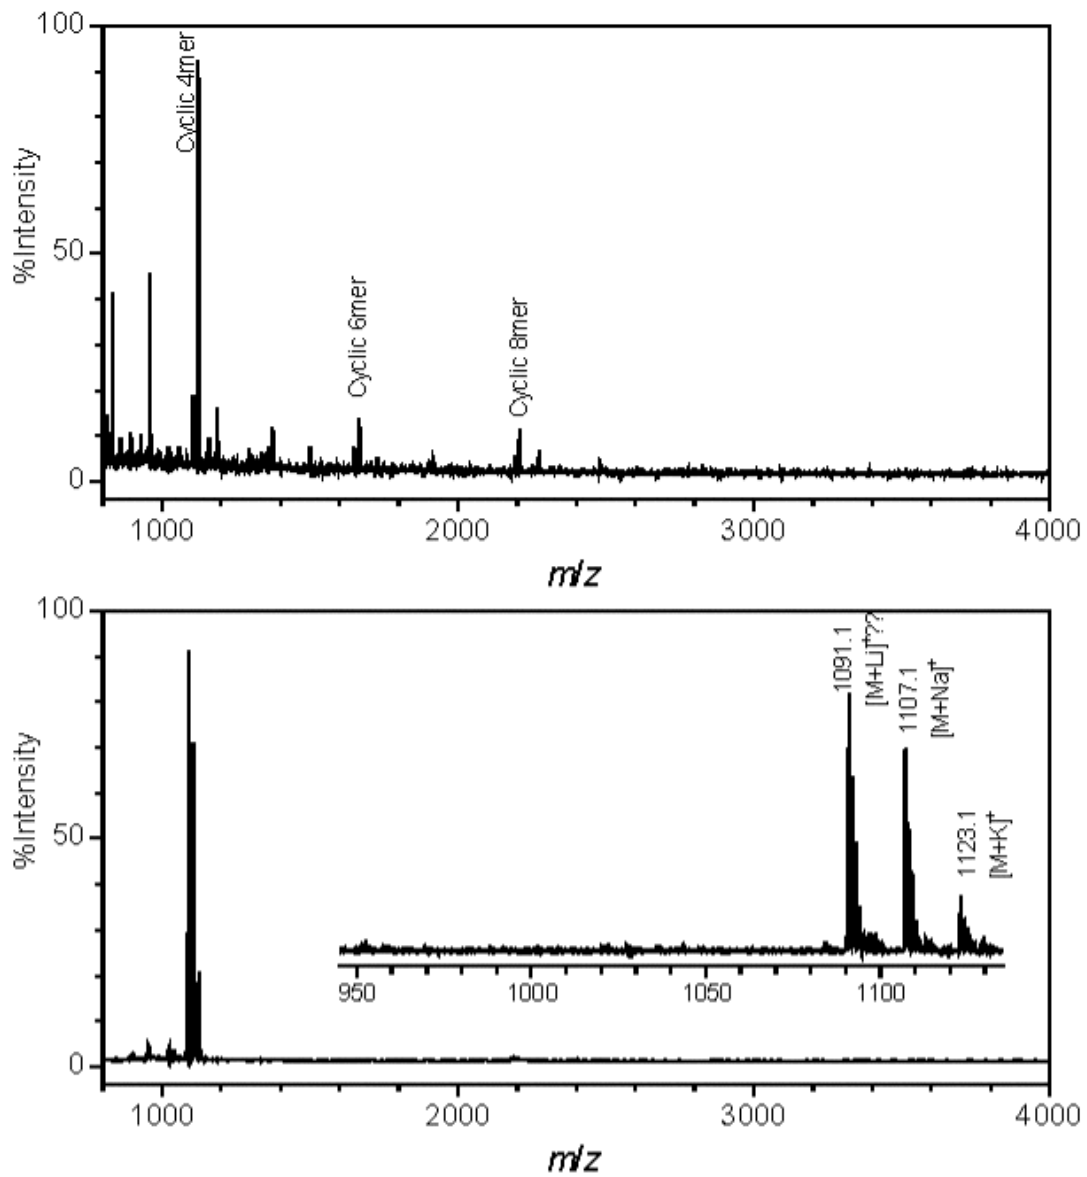

**Fig. 11** MALDI TOF MS Spectra of **4d** (R = *i*-C<sub>5</sub>H<sub>11</sub>). (Upper: crude, Lower: Purified).

### III. Energy-Minimized Model of an Alternative Conformation

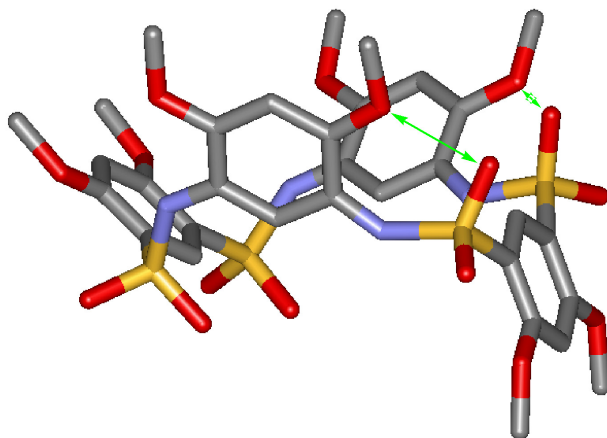

**Fig. 12** The energy-minimized (MM3 force field) partial cone conformation of macrocycle **4** (side chain = methoxy). Placing one of the benzene rings downward brings two of the sulfonamide oxygens and the methoxy oxygens into close proximity (green arrows;  $\sim 2.5$  Å).
